# Supplementary material for: Polypyrrole modified Fe0-loaded graphene oxide for the enrichment of uranium(vi) from simulated seawater
Source: Royal Society of Chemistry journal article supplement (doi:10.1039/c8dt02819b), 2018-01-01
Supplement: c8dt02819b1.pdf [file c8dt02819b1.pdf]

*Electronic Supplementary Information for*  
**Polypyrrole modified Fe<sup>0</sup>-loaded graphene oxide for enrichment of  
uranium (VI) from simulated seawater**

Yiming Zhang<sup>a</sup>, Hongsen Zhang<sup>a \*</sup>, Qi Liu<sup>a</sup>, Jingyuan Liu<sup>a</sup>, Rongrong Chen<sup>a</sup>, Jing Yu<sup>a</sup>, Xiaoyan Jing<sup>a</sup>,

Milin Zhang<sup>a</sup> and Jun Wang<sup>a, b, c \*</sup>

<sup>a</sup> *Key Laboratory of Superlight Material and Surface Technology, Ministry of Education, Harbin Engineering University, Harbin 150001, China. Fax: +86 451 8253 3026; Tel: +86 451 8253 3026; E-mail address: zhqw1888@sohu.com*

<sup>b</sup> *Institute of Advanced Marine Materials, Harbin Engineering University, 150001, China.*

<sup>c</sup> *Harbin Engineering University Assets Management Co., LTD, 150001, P. R. China.*

\* Corresponding author: Tel.: +86 451 8253 3026; fax: +86 451 8253 3026.

E-mail address: [zhqw1888@sohu.com](mailto:zhqw1888@sohu.com); [15604515455@163.com](mailto:15604515455@163.com);  
[junwang@hrbeu.edu.cn](mailto:junwang@hrbeu.edu.cn)

### **SI.1 Characterization**

The morphology of the samples was characterized using a transmission electron microscope (TEM) on a FEI Tecnai G2 S-Twin with a 200 kV accelerating voltage. The spectra of Fourier transform infrared (FTIR) were recorded on a PerkinElmer Paragon 1000PC spectrometer as the background from 400–4000  $\text{cm}^{-1}$ . The structures of samples were analyzed using X-ray diffraction (XRD) with a Rigaku D/max-III B diffractometer with CuK $\alpha$  irradiation ( $K\alpha = 1.54178 \text{ \AA}$ ). X-ray photoelectron spectroscopy (XPS) measurements were performed by a Thermo ESCALAB 250Xi spectrometer with monochromated Al K $\alpha$  radiation ( $h\nu = 1846.6 \text{ eV}$ ). The binding energy scale of spectrometer was calibrated using metallic Cu 2p $_{3/2}$  lines and Ag Fermi Edge of the respective reference metals.

Inductively coupled plasma-atomic emission spectroscope (ICP-AES, Optima-7000DV) was used to analyze the initial and equilibrium concentration of uranium (VI). The concentration of trace uranium (VI) was analyzed using inductively coupled plasma mass spectrometry (ICP-MS, Bruker 820-MS).

Table. S1: Kinetic parameters for the U (VI) adsorption on GO-PPy, rGO-Fe<sup>0</sup>, rGO-PPy-Fe<sup>0</sup>.

| Materials               | Pseudo-first order           |                |                                        | Pseudo-second order          |                |                              |
|-------------------------|------------------------------|----------------|----------------------------------------|------------------------------|----------------|------------------------------|
|                         | Q <sub>e,cal</sub><br>(mg/g) | R <sup>2</sup> | K <sub>1</sub><br>(min <sup>-1</sup> ) | Q <sub>e,exp</sub><br>(mg/g) | R <sup>2</sup> | K <sub>2</sub><br>(g/mg·min) |
| GO-PPy                  | 140.82                       | 0.9656         | 0.0193                                 | 174.74                       | 0.9822         | 1.14×10 <sup>-4</sup>        |
| rGO-Fe <sup>0</sup>     | 162.59                       | 0.9513         | 0.0179                                 | 202.16                       | 0.9678         | 9.17×10 <sup>-5</sup>        |
| rGO-PPy-Fe <sup>0</sup> | 206.56                       | 0.7758         | 0.0662                                 | 224.64                       | 0.9498         | 4.86×10 <sup>-4</sup>        |

Table. S2: Isotherm models and parameters for U (VI) on rGO-PPy-Fe<sup>0</sup>.

| Materials               | T(K) | Langmuir isotherm                       |                            |                | Freundlich isotherm                    |        |                |
|-------------------------|------|-----------------------------------------|----------------------------|----------------|----------------------------------------|--------|----------------|
|                         |      | Q <sub>m</sub><br>(mg·g <sup>-1</sup> ) | b<br>(L·mg <sup>-1</sup> ) | R <sup>2</sup> | K <sub>F</sub><br>(L·g <sup>-1</sup> ) | n      | R <sup>2</sup> |
| rGO-PPy-Fe <sup>0</sup> | 298  | 384.243                                 | 0.0399                     | 0.9635         | 75.043                                 | 3.5019 | 0.9543         |
|                         | 308  | 408.833                                 | 0.0496                     | 0.9627         | 88.081                                 | 3.6607 | 0.9162         |
|                         | 318  | 465.763                                 | 0.0560                     | 0.9522         | 110.388                                | 3.8113 | 0.9422         |

Table. S3: Thermodynamic parameters of adsorption of U (VI) on rGO-PPy-Fe<sup>0</sup>.

| T(K) | ΔG (kJ mol <sup>-1</sup> ) | ΔS (J mol <sup>-1</sup> ·K <sup>-1</sup> ) | ΔH (kJ mol <sup>-1</sup> ) |
|------|----------------------------|--------------------------------------------|----------------------------|
| 298  | -15.16                     | 168.59                                     | 36.143                     |
| 308  | -16.54                     |                                            |                            |
| 318  | -17.93                     |                                            |                            |

Table. S4: The concentration of each metal ion before and after adsorption

| Iron | $C_0$ (mg L <sup>-1</sup> ) | $C_e$ (mg L <sup>-1</sup> ) | $Q_e$ (mg g <sup>-1</sup> ) | Removal(%) | $K_d$ (mL g <sup>-1</sup> ) |
|------|-----------------------------|-----------------------------|-----------------------------|------------|-----------------------------|
| U    | 98.14                       | 1.844562                    | 194.650876                  | 99.17      | 105526.88                   |
| V    | 66.3                        | 0.031                       | 0.122                       | 66.3       | 3935.48                     |
| Ba   | 54.49                       | 24.79                       | 59.36                       | 54.49      | 2394.51                     |
| Cu   | 30.06                       | 0.6745                      | 0.5798                      | 30.06      | 859.60                      |
| Al   | 29.1                        | 5.38                        | 4.416                       | 29.1       | 820.82                      |
| Cr   | 28.68                       | 0.291                       | 0.234                       | 28.68      | 804.12                      |
| Ca   | 20.44                       | 10.24                       | 5.26                        | 20.44      | 513.67                      |
| Na   | 16.46                       | 9.29                        | 3.66                        | 16.46      | 393.97                      |
| Zn   | 2.59                        | 24.48                       | 1.3                         | 2.59       | 53.10                       |
| Mg   | 1.09                        | 10.91                       | 0.24                        | 1.09       | 22.00                       |
| Fe   | 48.55                       | 238.9                       |                             |            |                             |
